# Supplementary material for: Males have higher psychological readiness to return to sports than females after anterior cruciate ligament reconstruction: a systematic review and meta-analysis
Source: PubMed Central journal article supplement — BMJ Open Sport Exerc Med. 2024 Dec 15;10(4):e001996. doi: 10.1136/bmjsem-2024-001996 (PMC11667408; doi:10.1136/bmjsem-2024-001996), 2024-12-15
Supplement: bmjsem-10-4-s001.pdf [file bmjsem-10-4-s001.pdf]

### Supplementary material 3 – Full search strategy.

#### Applied search strategy with results for each database.

| Database              | Boolean search syntax and keywords                                                                                                                                                                                                                                                                                                                                                                                                                                                                                                                                                                                                                                             | Limits | Results |
|-----------------------|--------------------------------------------------------------------------------------------------------------------------------------------------------------------------------------------------------------------------------------------------------------------------------------------------------------------------------------------------------------------------------------------------------------------------------------------------------------------------------------------------------------------------------------------------------------------------------------------------------------------------------------------------------------------------------|--------|---------|
| <b>Web of Science</b> | ("males" OR "females" OR "men" OR "woman" OR "sex" OR "gender" OR "sex disparities" OR "sex differences" OR "gender disparities" OR "gender differences") AND ("psychological readiness to return to sport" OR "psychological readiness to return to play" OR "ACL-RSI scale" OR "ACL-RSI score" OR "return to play" OR "return to sport" OR "applied exercise psychology" OR "exercise psychology" OR "applied sport psychology" OR "sport psychology") AND ("anterior cruciate ligament" OR "ACL" OR "anterior cruciate ligament reconstruction" OR "ACLR" OR "anterior cruciate ligament surgery" OR "ACL injury" OR "knee" OR "knee injury" OR "lower extremity injuries") | N/A    | 231     |
| <b>Scopus</b>         | ("males" OR "females" OR "men" OR "woman" OR "sex" OR "gender" OR "sex disparities" OR "sex differences" OR "gender disparities" OR "gender differences") AND ("psychological readiness to return to sport" OR "psychological readiness to return to play" OR "ACL-RSI scale" OR "ACL-RSI score" OR "return to play" OR "return to sport" OR "applied exercise psychology" OR "exercise psychology" OR "applied sport psychology" OR "sport psychology") AND ("anterior cruciate ligament" OR "ACL" OR "anterior cruciate ligament reconstruction" OR "ACLR" OR "anterior cruciate ligament surgery" OR "ACL injury" OR "knee" OR "knee injury" OR "lower extremity injuries") | N/A    | 265     |
| <b>PubMed</b>         | ("males" OR "females" OR "men" OR "woman" OR "sex" OR "gender" OR "sex disparities" OR "sex differences" OR "gender disparities" OR "gender differences") AND ("psychological readiness to return to sport" OR "psychological readiness to return to play" OR "ACL-RSI scale" OR "ACL-RSI score" OR "return to play" OR "return to sport" OR "applied exercise psychology" OR "exercise psychology" OR "applied sport psychology" OR "sport psychology") AND ("anterior cruciate ligament" OR "ACL" OR "anterior cruciate ligament reconstruction" OR "ACLR" OR "anterior cruciate ligament surgery" OR "ACL injury" OR "knee" OR "knee injury" OR "lower extremity injuries") | N/A    | 274     |
| <b>Total</b>          |                                                                                                                                                                                                                                                                                                                                                                                                                                                                                                                                                                                                                                                                                |        | 770     |
