# Supplementary figures and images for: Males have higher psychological readiness to return to sports than females after anterior cruciate ligament reconstruction: a systematic review and meta-analysis
Source: PubMed Central journal article supplement — BMJ Open Sport Exerc Med. 2024 Dec 15;10(4):e001996. doi: 10.1136/bmjsem-2024-001996 (PMC11667408; doi:10.1136/bmjsem-2024-001996), 2024-12-15

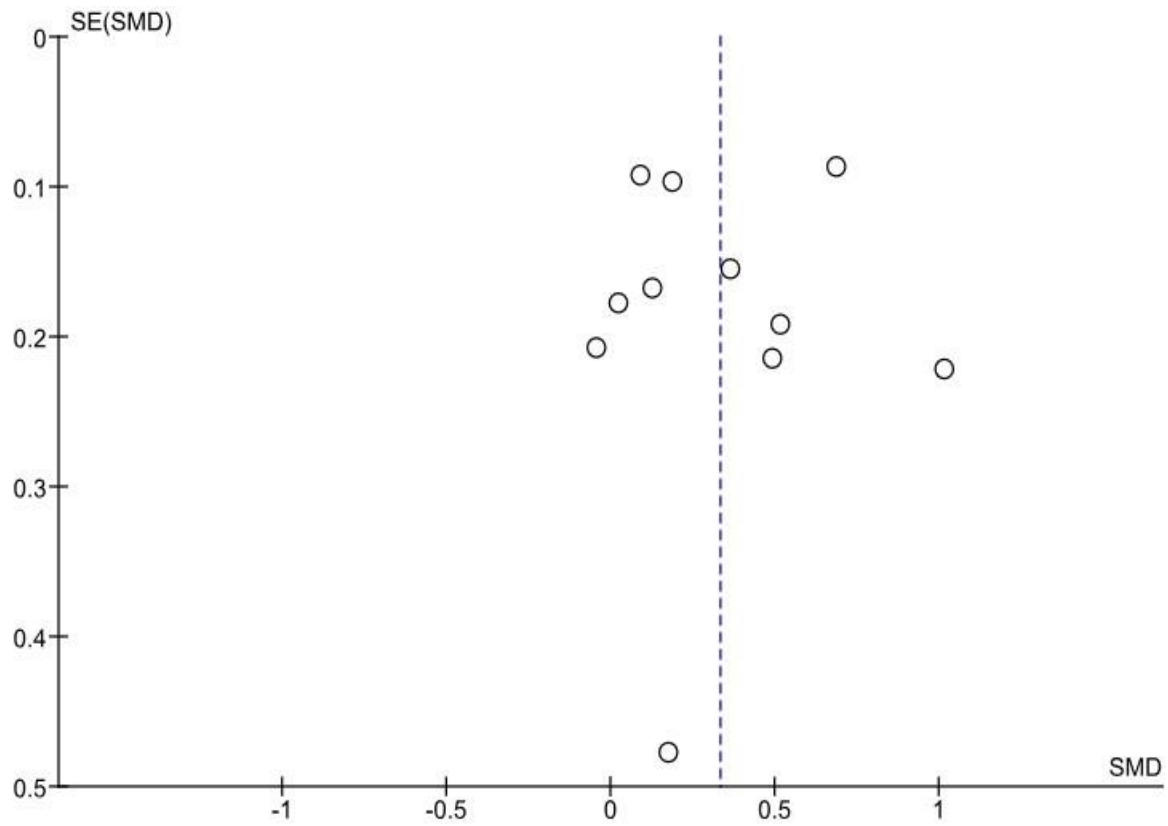

**FIGURE S1** The funnel plot presents the publication bias of involved studies.

Supplement: bmjsem-10-4-s004.pdf [file bmjsem-10-4-s004.pdf]
